# Supplementary material
Source: PubMed Central journal article supplement (PMC2808483)
Supplement: mmc1.pdf [file mmc1.pdf]

Biophysical Journal, Volume 98

**Supporting Material**

**Autoregulation of ROS via UCP control**

William J. Heuett and Vipul Periwal

## Supplemental Figure Legends

### Figure S1.

Uniporter  $\text{Ca}^{2+}$ -transport rate, computed as  $\tilde{J}_{\text{uni}}$  (dashed curves) and  $J_{\text{uni}}$  (solid curves), for physiological (A) concentrations of intracellular  $\text{Ca}^{2+}$  ( $\Delta\Psi = 120\text{mV}$ ) and (B)  $\Delta\Psi$  ( $C_{a_i} = 0.2\mu\text{M}$ ).

### Figure S2.

$\text{Na}^+/\text{Ca}^{2+}$ -exchanger rate, computed as  $\tilde{J}_{\text{NaCa}}$  (dashed curves) and  $J_{\text{NaCa}}$  (solid curves), for physiological (A) concentrations of mitochondrial  $\text{Ca}^{2+}$  ( $\Delta\Psi = 120\text{mV}$ ) and (B)  $\Delta\Psi$  ( $C_{a_m} = 0.2\mu\text{M}$ ).

### Figure S3.

$\text{NADH}_m$  production rate from glucose input, computed as  $\tilde{J}_{\text{N,Glu}}$  with  $ATP_i = 1.8\text{mM}$  (dashed curves) and  $J_{\text{N,Glu}}$  (solid curves), for physiological concentrations of (A) plasma glucose ( $C_{a_m} = 0.2\mu\text{M}$ ) and (B) mitochondrial  $\text{Ca}^{2+}$  ( $\text{Glu} = 10\text{mM}$ ).

### Figure S4.

$\text{H}_2\text{O}$  production rate from  $\text{NADH}_m$  oxidation, computed as  $\tilde{J}_{\text{O,N}}$  (dashed curves) and  $J_{\text{O,N}}$  (solid curves), for physiological (A) concentrations of  $\text{NADH}_m$  ( $\Delta\Psi = 120\text{mV}$ ) and (B)  $\Delta\Psi$  ( $\text{NADH}_m = 0.75\text{mM}$ ).

### Figure S5.

ATP production rate from the  $\text{F}_1\text{F}_0$ -ATP synthase, computed as  $\tilde{J}_{\text{F}_1\text{F}_0}$  (dashed curves) and  $J_{\text{F}_1\text{F}_0}$  (solid curves), for physiological (A) ATP/ADP ratios ( $\Delta\Psi = 120\text{mV}$ ) and (B)  $\Delta\Psi$  ( $ATP_m = 5\text{mM}$ ).

### Figure S6.

ANT exchange rate, computed as  $\tilde{J}_{\text{ANT}}$  (dashed curves) and  $J_{\text{ANT}}$  (solid curves), for physiological (A) ATP/ADP ratios ( $\Delta\Psi = 120\text{mV}$ ) and (B)  $\Delta\Psi$  ( $ATP_m = 5\text{mM}$ ).

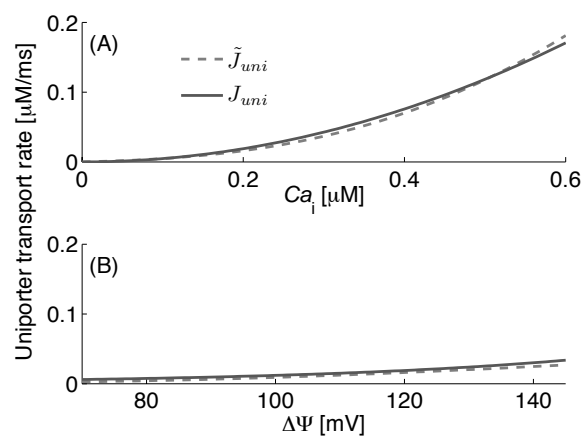

Figure S1:

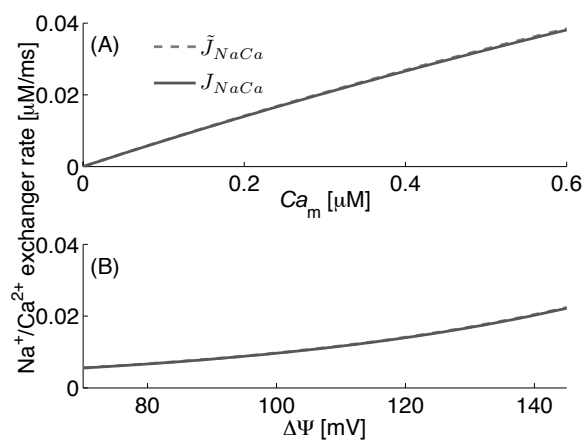

Figure S2:

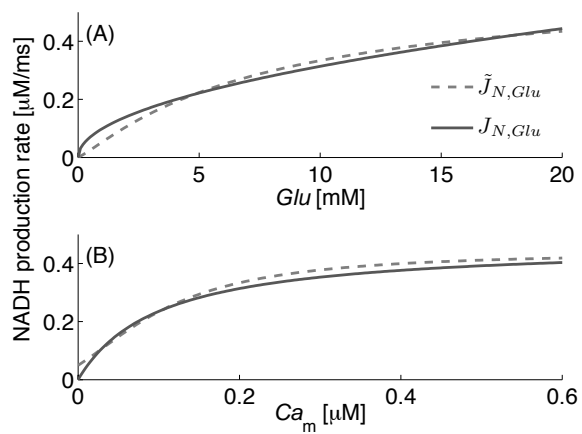

Figure S3:

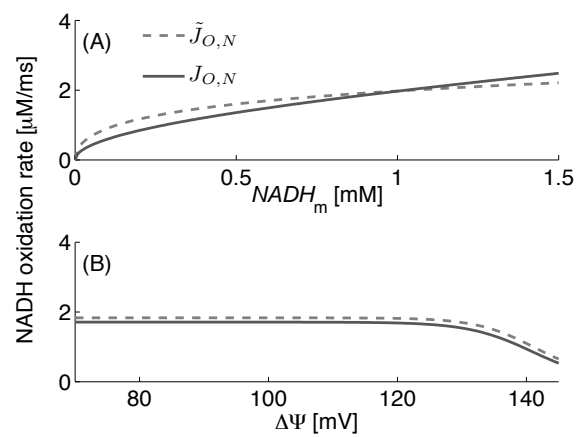

Figure S4:

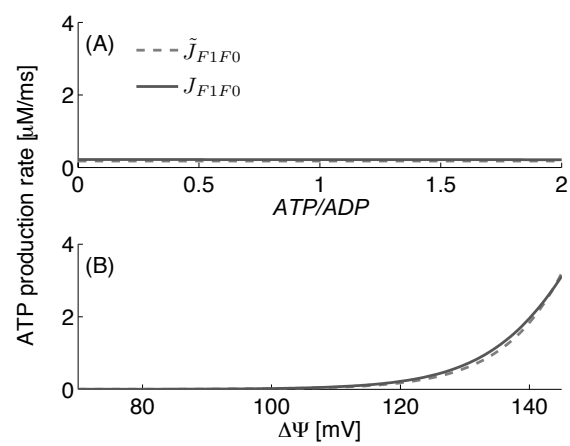

Figure S5:

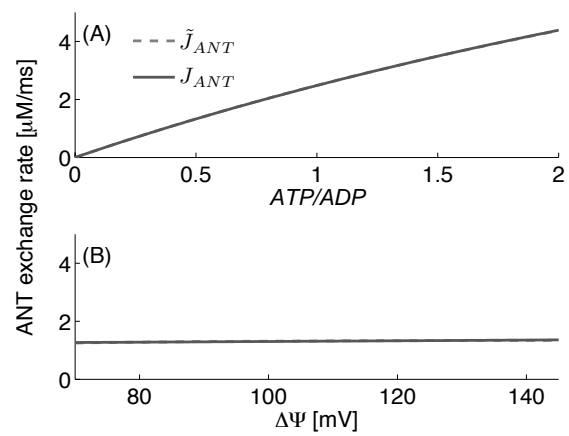

Figure S6:
